# Supplementary material
Source: MDPI journal article supplement (https://www.mdpi.com/2073-4344/13/3/570)
Supplement: s1 [file s1]

## Supplementary Materials

**Table S1.** Composition of hybrid zeolites

|            | Phase ratio          | Si/Al, mol/mol |
|------------|----------------------|----------------|
| MFI-MEL    | 55 (MFI):45 (MEL)    | 53             |
| MFI-MTW    | 60 (MFI):40 (MTW)    | 53             |
| MFI-MCM-41 | 80 (MFI):20 (MCM-41) | 55             |
| MFI        | 100 (MFI)            | 48             |

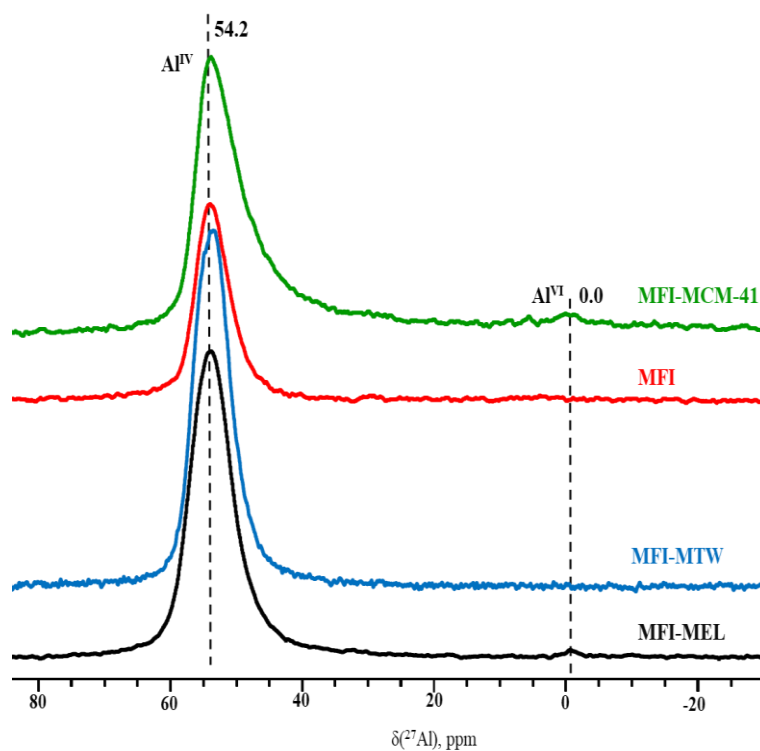

**Figure S1.**  $^{27}\text{Al}$  MAS NMR spectra of hybrid zeolites.

**Figure S1:** An intense peak with chemical shifts at ~54 ppm. corresponds to the 4-coordinated Al atoms in the zeolite framework. The spectra of the MEL-MFI and MFI-MCM-41 have a weak peak with chemical shifts at ~0 ppm. It corresponds to the octahedral Al atoms, which are not incorporated in the zeolite framework.

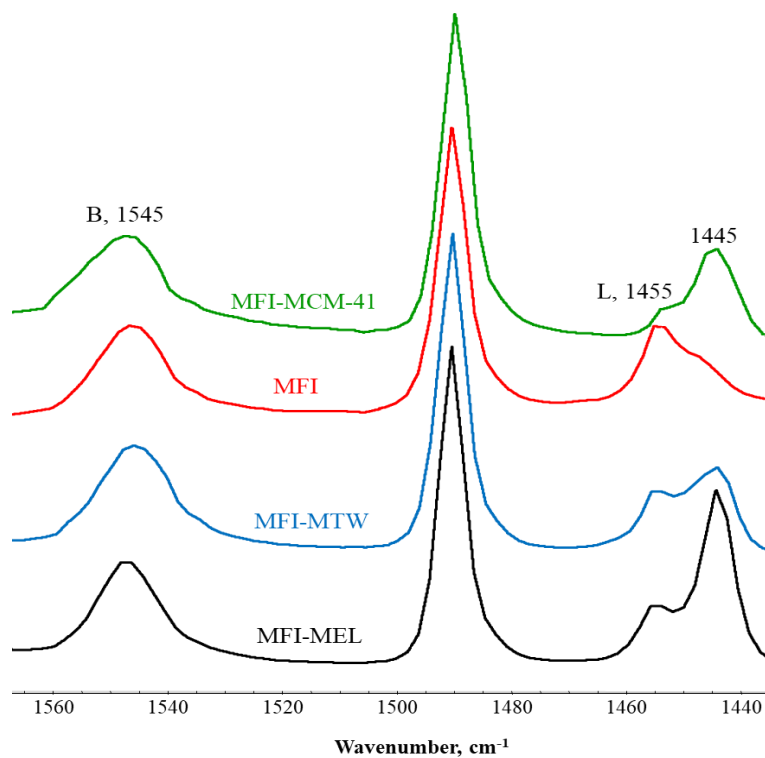

**Figure S2.** IR spectra of pyridine adsorbed on hybrid zeolites.

**Figure S2:** For all samples in the IR spectra of adsorbed pyridine, the peaks at 1455  $\text{cm}^{-1}$  and 1545  $\text{cm}^{-1}$  indicate the adsorption of pyridine on strong Lewis and Brønsted acid sites, respectively. The peak at 1445  $\text{cm}^{-1}$  characterizes physically adsorbed pyridine.

**Table S2.** Acid characteristics of hybrid zeolites.

|            | Number of acid sites, $\mu\text{mol Py/g}$ |             |              | <i>B/L</i> |
|------------|--------------------------------------------|-------------|--------------|------------|
|            | <i>BASs</i>                                | <i>LASs</i> | <i>Total</i> |            |
| MFI-MEL    | 90                                         | 25          | 115          | 3.6        |
| MFI-MTW    | 110                                        | 27          | 137          | 4.1        |
| MFI-MCM-41 | 85                                         | 20          | 105          | 4.3        |
| MFI        | 80                                         | 35          | 115          | 2.3        |

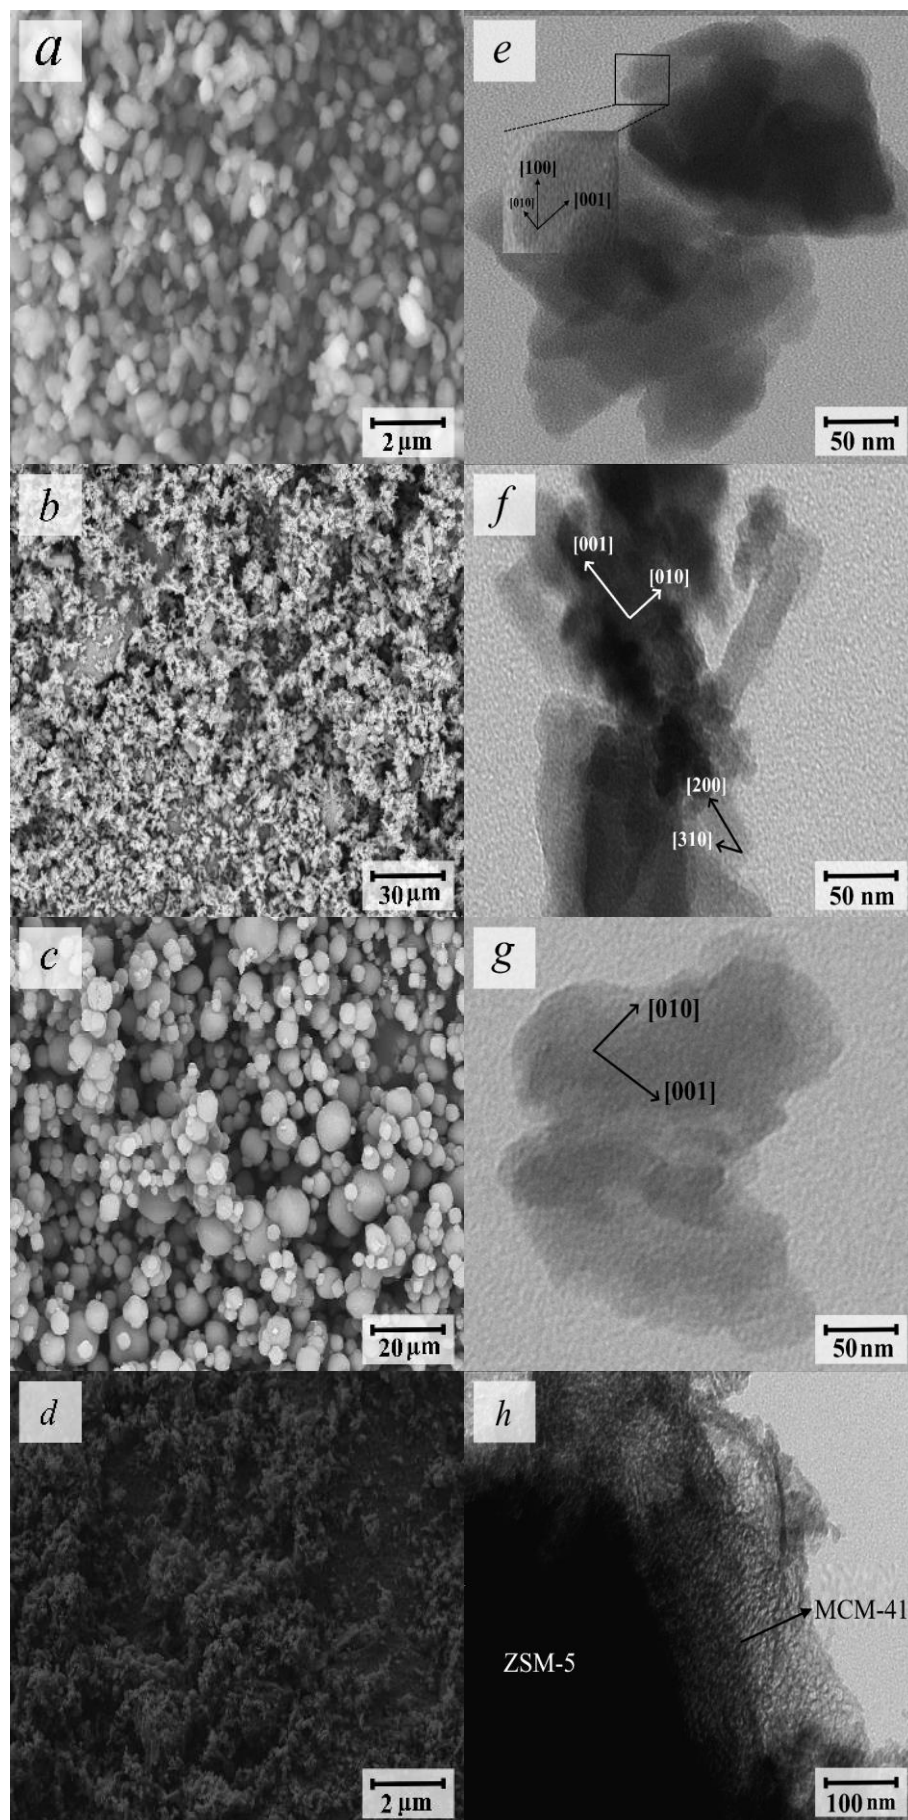

**Figure S3.** The micrographs of (a-d) SEM- and (e-h) TEM-hybrid zeolites: MFI-MEL (a,e); MFI-MTW(b,f); MFI (c,g); MFI-MCM-41 (d,h). Crystal planes of MFI: [010] and [001]; MEL: [010] and [100]; MTW: [200] and [310].

**Figure S3:** According to scanning and transmission electron microscopy (*a,e*), MEL-MFI co-crystallites are elongated oval crystals with an average size of 7–9  $\mu\text{m}$ , which consist of agglomerated nanocrystallites. It indicates the cocrystallization nature of the material. The MFI-MTW is represented by polycrystalline agglomerates with a size of 1–5  $\mu\text{m}$ , which consist of crystals with a hexagonal structure (*b,f*). The structure is characteristic of both MFI and MTW type zeolites. MFI structure zeolite particles have a spherical shape with an average size of 4–5  $\mu\text{m}$  (*c,g*). The MFI-MCM-41 composite is presented in the form of particles with a size of 1–2  $\mu\text{m}$ . According to the TEM, MFI-MCM-41 is a "core-shell" composite material (*d,h*).

**Table S3.** Additional textural properties of the catalysts.

|                                     | $S_{\text{BET}}$ , $\text{m}^2/\text{g}(\text{cat})$ | $S_{\text{micro}}$ , $\text{m}^2/\text{g}(\text{cat})$ | $S_{\text{meso}}$ , $\text{m}^2/\text{g}(\text{cat})$ | $S_{\text{external}}$ , $\text{m}^2/\text{g}(\text{cat})$ | $d_{\text{micro}}^1$ , nm | $d_{\text{meso}}^2$ , nm |
|-------------------------------------|------------------------------------------------------|--------------------------------------------------------|-------------------------------------------------------|-----------------------------------------------------------|---------------------------|--------------------------|
| MFI-MEL/ $\text{Al}_2\text{O}_3$    | 361                                                  | 250                                                    | 95                                                    | 15                                                        | 0.91                      | 5.79                     |
| MFI-MTW/ $\text{Al}_2\text{O}_3$    | 179                                                  | 11                                                     | 101                                                   | 67                                                        | 0.69                      | 19.67                    |
| MFI-MCM-41/ $\text{Al}_2\text{O}_3$ | 250                                                  | 42                                                     | 185                                                   | 24                                                        | 0.63                      | 7.58                     |
| MFI/ $\text{Al}_2\text{O}_3$        | 293                                                  | 181                                                    | 96                                                    | 14                                                        | 0.90                      | 8.27                     |

<sup>1</sup> average micropore diameter (MP-plot)

<sup>2</sup> average mesopore diameter (BJH method)

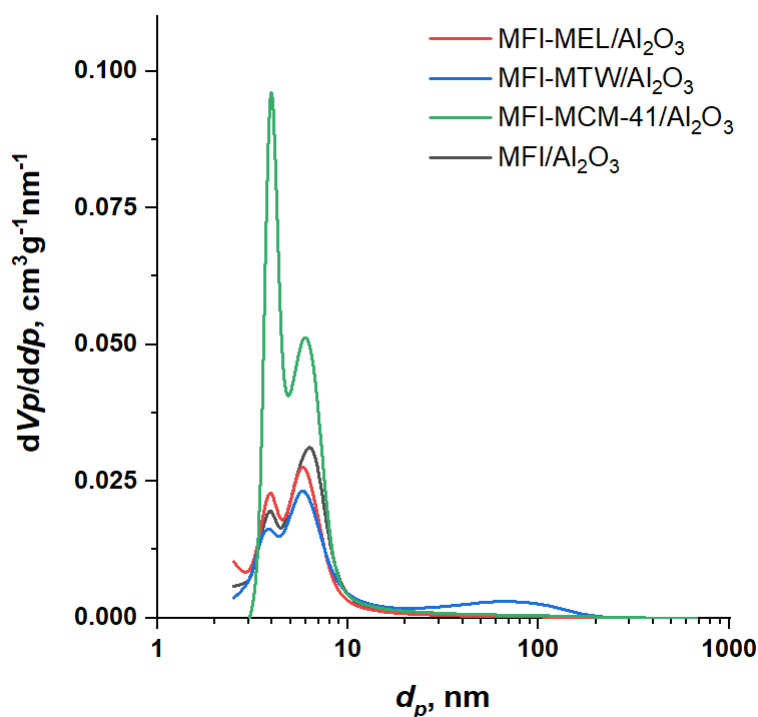

**Figure S4.** BJH plots (desorption curve) for the catalysts MFI-MEL/ $\text{Al}_2\text{O}_3$ , MFI-MTW/ $\text{Al}_2\text{O}_3$ , MFI-MCM-41/ $\text{Al}_2\text{O}_3$ , and MFI/ $\text{Al}_2\text{O}_3$ .

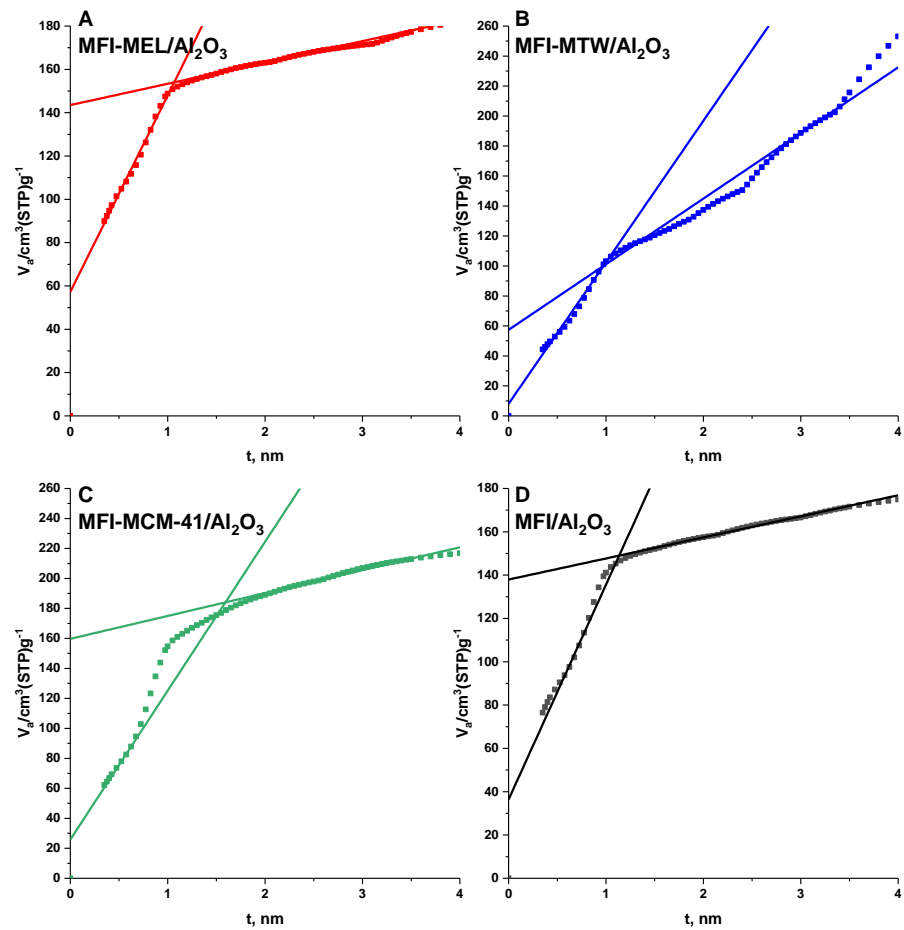

**Figure S5.** t-plots for nitrogen adsorbed in the catalysts MFI-MEL/ $\text{Al}_2\text{O}_3$  (A), MFI-MTW/ $\text{Al}_2\text{O}_3$  (B), MFI-MCM-41/ $\text{Al}_2\text{O}_3$  (C), and MFI/ $\text{Al}_2\text{O}_3$  (D).
